# Supplementary material for: Vulnerability-Based Critical Neurons, Synapses, and Pathways in the Caenorhabditis elegans Connectome
Source: PLoS Comput Biol. 2016 Aug 19;12(8):e1005084. doi: 10.1371/journal.pcbi.1005084 (PMC4991803; doi:10.1371/journal.pcbi.1005084)
Supplement: S4 File — (XLSX) [file pcbi.1005084.s013.xlsx]

## Sheet: FN
Top 240 synapses for vulnerability measures
C								E												B
Rank	Neuron	Type	Neuron	Type	Vulnerability	Percent	n*SD	Rank	Neuron	Type	Neuron	Type	Vulnerability	Percent	n*SD	Rank	Neuron	Type	Neuron	Type	Vulnerability	Percent	n*SD
1	AVAL	Inter	AVAR	Inter	0.0839435	8	32	1	PVCL	Inter	DVA	Inter	0.00980873	1	14	1	PVPR	Inter	DVC	Inter	0.0183795	2	17
2	AVAR	Inter	AVAL	Inter	0.075947	8	28	2	VD01	Motor	DVC	Inter	0.00633101	1	9	2	DVC	Inter	PVPR	Inter	0.0183795	2	17
3	AVAR	Inter	AS08	Motor	0.0335451	3	12	3	DVC	Inter	VD01	Motor	0.00633101	1	9	3	VD01	Motor	DVC	Inter	0.0138598	1	13
4	AVAL	Inter	AS08	Motor	0.0335444	3	12	4	AVEL	Inter	AVAL	Inter	0.00623568	1	9	4	DVC	Inter	VD01	Motor	0.0138598	1	13
5	AVAR	Inter	DA07	Motor	0.0213244	2	7	5	AVAL	Inter	PVCL	Inter	0.006193	1	9	5	DA01	Motor	VD01	Motor	0.0125837	1	11
6	AVAL	Inter	DA07	Motor	0.0212997	2	7	6	AVER	Inter	AVAR	Inter	0.00588195	1	8	6	AVAR	Inter	PVCL	Inter	0.011187	1	10
7	VA08	Motor	DD04	Motor	0.0176981	2	6	7	AVAR	Inter	VA11	Motor	0.00571698	1	8	7	PVPR	Inter	AVHL	Inter	0.0111823	1	10
8	VD08	Motor	DD04	Motor	0.0155255	2	5	8	PVPR	Inter	DVC	Inter	0.00534377	1	7	8	AQR	Sensory	PVPL	Inter	0.00976954	1	9
9	SMBVR	Motor	SAADR	Inter	0.0128823	1	4	9	DVC	Inter	PVPR	Inter	0.00534377	1	7	9	PVPL	Inter	AQR	Sensory	0.00976954	1	9
10	PLNR	Sensory	SMBVR	Motor	0.0127869	1	4	10	VA11	Motor	AVAR	Inter	0.00440233	0	6	10	AVAR	Inter	DA01	Motor	0.00930911	1	8
11	PLNR	Sensory	SAADR	Inter	0.0127726	1	4	11	AVAR	Inter	DA01	Motor	0.00419036	0	6	11	DA01	Motor	AVAR	Inter	0.00930911	1	8
12	AS09	Motor	DVB	Motor	0.0123458	1	4	12	DA01	Motor	AVAR	Inter	0.00419036	0	6	12	AQR	Sensory	PVPR	Inter	0.00840353	1	7
13	DVB	Motor	AS09	Motor	0.0123458	1	4	13	AVAL	Inter	VA08	Motor	0.00417165	0	6	13	PVPR	Inter	AQR	Sensory	0.00831105	1	7
14	AVBL	Inter	AVBR	Inter	0.0101318	1	3	14	DA01	Motor	VD01	Motor	0.00399224	0	5	14	RMDL	Motor	OLLR	Sensory	0.00813136	1	7
15	AVBR	Inter	AVBL	Inter	0.0101318	1	3	15	SAAVL	Inter	AVAL	Inter	0.00397173	0	5	15	AVER	Inter	AVAR	Inter	0.00812419	1	7
16	PLNL	Sensory	SAADL	Inter	0.00988299	1	3	16	AIAL	Inter	AIBL	Inter	0.00388236	0	5	16	AVAL	Inter	PVCL	Inter	0.00721526	1	6
17	SMBVL	Motor	SAADL	Inter	0.00973038	1	3	17	PVPL	Inter	PHAR	Sensory	0.0038547	0	5	17	RIBL	Inter	AVER	Inter	0.00677776	1	6
18	VD09	Motor	PDER	Sensory	0.00958538	1	3	18	PHAR	Sensory	PVPL	Inter	0.0038547	0	5	18	AVAL	Inter	RIMR	Motor	0.00652174	1	5
19	PDER	Sensory	VD09	Motor	0.00958538	1	3	19	AVAL	Inter	VA02	Motor	0.00383241	0	5	19	RIMR	Motor	AVAL	Inter	0.00652174	1	5
20	AVBL	Inter	AVAL	Inter	0.00934063	1	3	20	VA02	Motor	AVAL	Inter	0.00383241	0	5	20	PVCL	Inter	DVA	Inter	0.00549398	1	4
21	AVBL	Inter	AVAR	Inter	0.00828889	1	2	21	AVAL	Inter	DA06	Motor	0.00382872	0	5	21	AVHL	Inter	PVQR	Inter	0.00530398	1	4
22	PVDL	Inter	DD05	Motor	0.00802049	1	2	22	AIAR	Inter	AIBR	Inter	0.0038072	0	5	22	OLLR	Sensory	CEPVR	Sensory	0.00525372	1	4
23	VB08	Motor	DD05	Motor	0.00732343	1	2	23	AS09	Motor	DVB	Motor	0.00380698	0	5	23	RMER	Motor	RMEV	Motor	0.00487003	0	4
24	AVDL	Inter	AVAR	Inter	0.00707459	1	2	24	DVB	Motor	AS09	Motor	0.00380698	0	5	24	RMEV	Motor	RMER	Motor	0.00487003	0	4
25	AVAR	Inter	VA10	Motor	0.007013	1	2	25	AVAL	Inter	VA06	Motor	0.00374521	0	5	25	SMBVL	Motor	PLNL	Sensory	0.00469678	0	4
26	PVCR	Inter	AVAR	Inter	0.00698489	1	2	26	VA06	Motor	AVAL	Inter	0.00360536	0	5	26	RIBL	Inter	SIADL	Inter	0.00465456	0	4
27	AVAL	Inter	PVCL	Inter	0.00683353	1	2	27	SAAVR	Inter	AVAR	Inter	0.00358028	0	5	27	SIADL	Inter	RIBL	Inter	0.00465456	0	4
28	AVDR	Inter	AVAR	Inter	0.00681665	1	2	28	AVAL	Inter	DA07	Motor	0.00344963	0	4	28	OLQVL	Sensory	IL2VL	Sensory	0.00457011	0	4
29	PVDR	Inter	PVDL	Inter	0.00669232	1	2	29	DA07	Motor	AVAL	Inter	0.00344963	0	4	29	RIBL	Inter	SIAVL	Inter	0.00445148	0	3
30	AVAR	Inter	PVCR	Inter	0.00639678	1	2	30	VA08	Motor	VD08	Motor	0.00344268	0	4	30	SIAVL	Inter	RIBL	Inter	0.00445148	0	3
31	AVBR	Inter	AVAL	Inter	0.0063236	1	2	31	AIZL	Inter	AVER	Inter	0.00343837	0	4	31	RIBR	Inter	SIADR	Inter	0.00400781	0	3
32	AVAL	Inter	AS09	Motor	0.00628681	1	2	32	VA08	Motor	AVAL	Inter	0.00342637	0	4	32	SIADR	Inter	RIBR	Inter	0.00400781	0	3
33	AVBR	Inter	AVAR	Inter	0.00626823	1	2	33	AVAL	Inter	AS09	Motor	0.00342034	0	4	33	RIBR	Inter	SIAVR	Inter	0.00397966	0	3
34	ASJL	Sensory	ASJR	Sensory	0.0062239	1	2	34	AVAL	Inter	PVCR	Inter	0.00336696	0	4	34	SIAVR	Inter	RIBR	Inter	0.00397966	0	3
35	ASJR	Sensory	ASJL	Sensory	0.0062239	1	2	35	PVCR	Inter	AVAL	Inter	0.00332705	0	4	35	PVQR	Inter	AIAR	Inter	0.00396693	0	3
36	VB08	Motor	VB09	Motor	0.00620101	1	2	36	DA06	Motor	AVAL	Inter	0.00330916	0	4	36	AIBR	Inter	RIML	Motor	0.00393194	0	3
37	VA09	Motor	DD05	Motor	0.00618555	1	2	37	PVPR	Inter	AQR	Sensory	0.00321038	0	4	37	DVA	Inter	AQR	Sensory	0.00390728	0	3
38	AVDR	Inter	AVAL	Inter	0.00612449	1	2	38	AVAL	Inter	RIMR	Motor	0.00319599	0	4	38	AVFL	Inter	AVFR	Inter	0.00373705	0	3
39	PVCR	Inter	AVAL	Inter	0.00601717	1	1	39	RIMR	Motor	AVAL	Inter	0.00319599	0	4	39	AVJL	Inter	AVHL	Inter	0.00371627	0	3
40	PVDR	Inter	VA09	Motor	0.00593979	1	1	40	AQR	Sensory	PVPR	Inter	0.00318734	0	4	40	AVFR	Inter	AVHL	Inter	0.00369952	0	3
41	PVCR	Inter	PVCL	Inter	0.00589358	1	1	41	DVA	Inter	PVR	Sensory	0.00318625	0	4	41	AVFR	Inter	AVFL	Inter	0.00363116	0	3
42	AVDL	Inter	AVAL	Inter	0.00588563	1	1	42	VA08	Motor	DD04	Motor	0.00305432	0	4	42	AVFL	Inter	AVHR	Inter	0.00353331	0	3
43	VB08	Motor	VA09	Motor	0.00585071	1	1	43	AQR	Sensory	PVPL	Inter	0.00291996	0	4	43	PVCR	Inter	PVDL	Inter	0.0035266	0	3
44	AVAL	Inter	PVCR	Inter	0.00579984	1	1	44	PVPL	Inter	AQR	Sensory	0.00291996	0	4	44	RIMR	Motor	RMDL	Motor	0.00347232	0	3
45	AVAR	Inter	DA01	Motor	0.00574409	1	1	45	VD08	Motor	VA08	Motor	0.00281582	0	3	45	AVAL	Inter	DA07	Motor	0.00341401	0	2
46	PVDR	Inter	PVCR	Inter	0.00547835	1	1	46	AIYR	Inter	AIZR	Inter	0.00276413	0	3	46	DA07	Motor	AVAL	Inter	0.00341401	0	2
47	PVCL	Inter	PVCR	Inter	0.00547732	1	1	47	DVA	Inter	PVCL	Inter	0.00272675	0	3	47	AIAR	Inter	AIBR	Inter	0.00323775	0	2
48	PDEL	Sensory	PDER	Sensory	0.00540933	1	1	48	AVAL	Inter	VA05	Motor	0.00269954	0	3	48	PVPL	Inter	VD13	Motor	0.00310036	0	2
49	AVBL	Inter	VA10	Motor	0.0053059	1	1	49	AIYL	Inter	AIZL	Inter	0.0026918	0	3	49	VD13	Motor	PVPL	Inter	0.00310036	0	2
50	VB08	Motor	VD09	Motor	0.00521229	1	1	50	VA05	Motor	AVAL	Inter	0.00264306	0	3	50	AVBR	Inter	PVNL	Inter	0.00302315	0	2
51	AVAL	Inter	AS07	Motor	0.00502809	1	1	51	AIBL	Inter	RIMR	Motor	0.00260818	0	3	51	PVNL	Inter	AVBR	Inter	0.00302315	0	2
52	SIBDL	Inter	RIBL	Inter	0.00501903	1	1	52	OLLR	Sensory	AVEL	Inter	0.00251282	0	3	52	AVAL	Inter	VA02	Motor	0.00279876	0	2
53	RIBL	Inter	SIBDL	Inter	0.00501903	1	1	53	AVAR	Inter	DA05	Motor	0.00249836	0	3	53	VA02	Motor	AVAL	Inter	0.00279876	0	2
54	VA09	Motor	VB08	Motor	0.00495344	0	1	54	DA05	Motor	AVAR	Inter	0.00249836	0	3	54	AVAL	Inter	VA01	Motor	0.00276056	0	2
55	AVAR	Inter	PVCL	Inter	0.00495173	0	1	55	VD10	Motor	DVC	Inter	0.00247674	0	3	55	VA01	Motor	AVAL	Inter	0.00276056	0	2
56	VB09	Motor	VA09	Motor	0.00483535	0	1	56	DVC	Inter	VD10	Motor	0.00247674	0	3	56	AIAL	Inter	ASER	Sensory	0.00262116	0	2
57	VA09	Motor	VB09	Motor	0.00483535	0	1	57	SAADL	Inter	AVAL	Inter	0.00239286	0	3	57	DVA	Inter	PVR	Sensory	0.0026101	0	2
58	AVAL	Inter	DA06	Motor	0.00479312	0	1	58	AVAR	Inter	VA04	Motor	0.00237502	0	3	58	PDEL	Sensory	PVCR	Inter	0.00260642	0	2
59	AVBL	Inter	AS07	Motor	0.00470393	0	1	59	VA04	Motor	AVAR	Inter	0.00237502	0	3	59	PVCR	Inter	PDEL	Sensory	0.00260642	0	2
60	AS07	Motor	AVBL	Inter	0.00470393	0	1	60	PVCR	Inter	PVWR	Inter	0.00233559	0	3	60	PVPL	Inter	PHAR	Sensory	0.00259703	0	2
61	VB09	Motor	VB08	Motor	0.00461898	0	1	61	DVA	Inter	AVEL	Inter	0.00232788	0	3	61	PHAR	Sensory	PVPL	Inter	0.00259703	0	2
62	PVDR	Inter	PVCL	Inter	0.00458066	0	1	62	PDER	Sensory	DVA	Inter	0.00231106	0	3	62	AVAR	Inter	DA03	Motor	0.00259167	0	2
63	VD01	Motor	VD02	Motor	0.00450266	0	1	63	AVAL	Inter	DA04	Motor	0.00229492	0	3	63	DA03	Motor	AVAR	Inter	0.00259167	0	2
64	VD02	Motor	VD01	Motor	0.00450266	0	1	64	AVAR	Inter	VA03	Motor	0.00228239	0	3	64	VC03	Motor	PVQR	Inter	0.00254007	0	2
65	VD01	Motor	DD01	Motor	0.00450215	0	1	65	DVA	Inter	RIR	Inter	0.00226469	0	3	65	VD05	Motor	VA05	Motor	0.00251527	0	2
66	AVFL	Inter	AVFR	Inter	0.00449962	0	1	66	VA11	Motor	DD06	Motor	0.00225655	0	3	66	URXL	Sensory	AUAL	Sensory	0.00243451	0	2
67	AVAR	Inter	DA05	Motor	0.00446676	0	1	67	AVAR	Inter	DA08	Motor	0.00224302	0	3	67	VD04	Motor	PVPR	Inter	0.00242077	0	2
68	PVCL	Inter	AVAL	Inter	0.00445934	0	1	68	RMDL	Motor	OLLR	Sensory	0.00222813	0	3	68	PVPR	Inter	VD04	Motor	0.00242077	0	2
69	VB09	Motor	DD05	Motor	0.00445526	0	1	69	RIBL	Inter	AVER	Inter	0.00221753	0	3	69	AVBL	Inter	VC03	Motor	0.00235844	0	1
70	PVQL	Inter	ASKL	Sensory	0.00445429	0	1	70	AVAR	Inter	VA07	Motor	0.00220096	0	3	70	RIR	Inter	URXL	Sensory	0.00233096	0	1
71	AVAR	Inter	SABVL	Inter	0.00442887	0	1	71	VA07	Motor	AVAR	Inter	0.00220096	0	3	71	VA08	Motor	AVAR	Inter	0.00225188	0	1
72	AS11	Motor	PDB	Motor	0.00440665	0	1	72	AIBR	Inter	RIML	Motor	0.00217826	0	2	72	PVCL	Inter	AVJL	Inter	0.00223714	0	1
73	RID	Motor	PDB	Motor	0.00435924	0	1	73	PVCR	Inter	PVDL	Inter	0.00212555	0	2	73	VA08	Motor	AVAL	Inter	0.00223177	0	1
74	PDB	Motor	RID	Motor	0.00435924	0	1	74	AFDR	Sensory	AIYR	Inter	0.00208149	0	2	74	RIAL	Inter	RMDL	Motor	0.00220161	0	1
75	PVCL	Inter	AVBR	Inter	0.00435613	0	1	75	AVFL	Inter	AVFR	Inter	0.00205044	0	2	75	VD10	Motor	DVC	Inter	0.00219089	0	1
76	AVAR	Inter	AVBL	Inter	0.00430962	0	1	76	AVAR	Inter	SABVL	Inter	0.00204362	0	2	76	DVC	Inter	VD10	Motor	0.00219089	0	1
77	PVDR	Inter	DVA	Inter	0.00426149	0	1	77	AVL	Motor	DVC	Inter	0.0020387	0	2	77	VA11	Motor	AVAR	Inter	0.00215437	0	1
78	AVAR	Inter	AS09	Motor	0.00410999	0	1	78	DVC	Inter	AVL	Motor	0.0020387	0	2	78	VD13	Motor	AVAR	Inter	0.00214364	0	1
79	PVCL	Inter	AVAR	Inter	0.00409004	0	1	79	AVKR	Inter	PVPL	Inter	0.00203009	0	2	79	RIMR	Motor	AIBL	Inter	0.0021299	0	1
80	AVER	Inter	AVAR	Inter	0.00406774	0	1	80	PVPL	Inter	AVKR	Inter	0.00203009	0	2	80	AVAR	Inter	VA04	Motor	0.00209907	0	1
81	AVL	Motor	PVM	Sensory	0.00402032	0	1	81	AVAR	Inter	LUAR	Inter	0.00201643	0	2	81	VA04	Motor	AVAR	Inter	0.00209907	0	1
82	PVM	Sensory	AVL	Motor	0.00402032	0	1	82	OLLL	Sensory	AVER	Inter	0.00199869	0	2	82	VC03	Motor	DD04	Motor	0.00203876	0	1
83	PDER	Sensory	PDEL	Sensory	0.00391645	0	1	83	VD02	Motor	VA02	Motor	0.0019969	0	2	83	AVER	Inter	AVAL	Inter	0.00203876	0	1
84	DA01	Motor	AVAR	Inter	0.00391415	0	1	84	AS09	Motor	AVAL	Inter	0.00199232	0	2	84	DVA	Inter	AUAR	Sensory	0.0020287	0	1
85	AVAR	Inter	DA06	Motor	0.00387922	0	1	85	AFDL	Sensory	AIYL	Inter	0.00197124	0	2	85	RMEL	Motor	RIGL	Inter	0.00198749	0	1
86	AVBR	Inter	AS07	Motor	0.00383025	0	1	86	AIZL	Inter	AIAL	Inter	0.00194503	0	2	86	RIGL	Inter	RMEL	Motor	0.00198749	0	1
87	AVBR	Inter	VB09	Motor	0.00379759	0	1	87	PDEL	Sensory	DVA	Inter	0.00187114	0	2	87	DVC	Inter	RIGL	Inter	0.00198045	0	1
88	VB09	Motor	AVBR	Inter	0.00379759	0	1	88	PVWR	Inter	PVCR	Inter	0.00183202	0	2	88	DVA	Inter	AIZL	Inter	0.00197743	0	1
89	PDER	Sensory	DVA	Inter	0.00379189	0	1	89	AVBR	Inter	DB01	Motor	0.00178078	0	2	89	DD04	Motor	VC03	Motor	0.00196637	0	1
90	SIBDL	Inter	SIBVL	Inter	0.00376275	0	1	90	DB01	Motor	AVBR	Inter	0.00178078	0	2	90	AVAR	Inter	ADER	Sensory	0.00196034	0	1
91	SIBVL	Inter	SIBDL	Inter	0.00376275	0	1	91	AVAL	Inter	AS07	Motor	0.00175669	0	2	91	AVHL	Inter	AVFR	Inter	0.0019523	0	1
92	AVAL	Inter	VA05	Motor	0.00374668	0	1	92	SABVL	Inter	AVAR	Inter	0.00173561	0	2	92	AVJL	Inter	PVCL	Inter	0.00191343	0	1
93	AVAR	Inter	VA05	Motor	0.00373999	0	1	93	RIBL	Inter	SIAVL	Inter	0.00173552	0	2	93	AVAR	Inter	RIML	Motor	0.00187657	0	1
94	PVDL	Inter	VD10	Motor	0.00366727	0	1	94	SIAVL	Inter	RIBL	Inter	0.00173552	0	2	94	RIML	Motor	AVAR	Inter	0.00187657	0	1
95	PVM	Sensory	PDER	Sensory	0.00364239	0	1	95	DA04	Motor	VD05	Motor	0.00172973	0	2	95	SDQR	Inter	DVA	Inter	0.00187188	0	1
96	AVAL	Inter	DA05	Motor	0.00363338	0	1	96	RIBL	Inter	SIADL	Inter	0.00172593	0	2	96	RMDR	Motor	RIMR	Motor	0.00186718	0	1
97	AVAR	Inter	VA11	Motor	0.00362754	0	1	97	SIADL	Inter	RIBL	Inter	0.00172593	0	2	97	AVAL	Inter	PVCR	Inter	0.00186182	0	1
98	AVAR	Inter	AS07	Motor	0.00359583	0	1	98	SMBVL	Motor	PLNL	Sensory	0.00171442	0	2	98	ASIL	Sensory	AIAL	Inter	0.00185244	0	1
99	PVDR	Inter	AVAL	Inter	0.00357976	0	1	99	AVAR	Inter	DB05	Motor	0.00169151	0	2	99	AIAL	Inter	ASIL	Sensory	0.00185244	0	1
100	AVFR	Inter	AVFL	Inter	0.00356508	0	1	100	DB05	Motor	AVAR	Inter	0.00169151	0	2	100	AIZR	Inter	AVEL	Inter	0.00185177	0	1
101	AVEL	Inter	AVAL	Inter	0.00353247	0	1	101	RIBR	Inter	SIADR	Inter	0.00169066	0	2	101	RIBR	Inter	AVEL	Inter	0.00184909	0	1
102	PVDR	Inter	AVAR	Inter	0.00352467	0	1	102	SIADR	Inter	RIBR	Inter	0.00169066	0	2	102	VD08	Motor	VA08	Motor	0.00183568	0	1
103	AVAL	Inter	VA10	Motor	0.00352053	0	1	103	PVCR	Inter	AVAR	Inter	0.00168304	0	2	103	PVQL	Inter	AIAL	Inter	0.00182362	0	1
104	PVCR	Inter	AVBL	Inter	0.00350061	0	1	104	DA03	Motor	VD03	Motor	0.00167093	0	2	104	HSNL	Motor	ASJR	Sensory	0.00181223	0	1
105	PDB	Motor	VD13	Motor	0.00349622	0	1	105	RIBR	Inter	SIAVR	Inter	0.00166692	0	2	105	AVAR	Inter	VA08	Motor	0.0018015	0	1
106	AVAL	Inter	VA08	Motor	0.00349333	0	1	106	SIAVR	Inter	RIBR	Inter	0.00166692	0	2	106	AVAL	Inter	VA08	Motor	0.00178944	0	1
107	AVAL	Inter	AVBR	Inter	0.00345799	0	1	107	PVR	Sensory	DVA	Inter	0.00166112	0	2	107	AIAR	Inter	ADLR	Sensory	0.00177738	0	1
108	AVAR	Inter	AVDR	Inter	0.00343886	0	1	108	AVAL	Inter	VA09	Motor	0.00165395	0	2	108	URYVL	Sensory	AVAR	Inter	0.00173113	0	1
109	VD10	Motor	DD05	Motor	0.00331384	0	0	109	PVPR	Inter	AVHL	Inter	0.00164596	0	2	109	AVAR	Inter	URYVL	Sensory	0.00173113	0	1
110	VC02	Motor	VC01	Motor	0.00329081	0	0	110	VB01	Motor	SAADL	Inter	0.00163656	0	2	110	VD05	Motor	PVPR	Inter	0.0017251	0	1
111	SIBVL	Inter	RIBL	Inter	0.00328297	0	0	111	DVA	Inter	AIZL	Inter	0.00160868	0	2	111	PVPR	Inter	VD05	Motor	0.0017251	0	1
112	RIBL	Inter	SIBVL	Inter	0.00328297	0	0	112	DA05	Motor	VD06	Motor	0.00159309	0	2	112	CEPDR	Sensory	AVEL	Inter	0.00169896	0	1
113	PVDL	Inter	AVAL	Inter	0.00327429	0	0	113	PVCR	Inter	PVWL	Inter	0.00159099	0	2	113	AVAL	Inter	VA12	Motor	0.00166478	0	1
114	DD01	Motor	VD01	Motor	0.0032684	0	0	114	PVWL	Inter	PVCR	Inter	0.00159099	0	2	114	AFDL	Sensory	AIBL	Inter	0.00165071	0	1
115	AS11	Motor	VD13	Motor	0.00324411	0	0	115	AVFR	Inter	AVFL	Inter	0.00158807	0	2	115	AIBL	Inter	AFDL	Sensory	0.00165071	0	1
116	PVCR	Inter	AVBR	Inter	0.00321518	0	0	116	AVAR	Inter	VA08	Motor	0.00154731	0	2	116	ASHR	Sensory	RICR	Inter	0.00165037	0	1
117	PVCL	Inter	AVBL	Inter	0.00319547	0	0	117	AVAR	Inter	PVCR	Inter	0.00151765	0	1	117	RICR	Inter	ASHR	Sensory	0.00165037	0	1
118	AVAL	Inter	SABD	Inter	0.00317617	0	0	118	RIGR	Inter	RMHL	Motor	0.00150598	0	1	118	SAADL	Inter	AVAL	Inter	0.0016487	0	1
119	SABD	Inter	AVAL	Inter	0.00317617	0	0	119	DA04	Motor	AVAL	Inter	0.00149908	0	1	119	PVCR	Inter	PVWL	Inter	0.00163999	0	1
120	VC01	Motor	VC02	Motor	0.00305803	0	0	120	AVAL	Inter	SABD	Inter	0.00149649	0	1	120	PVWL	Inter	PVCR	Inter	0.00163999	0	1
121	PVDL	Inter	AVAR	Inter	0.00304908	0	0	121	SABD	Inter	AVAL	Inter	0.00149649	0	1	121	DA02	Motor	VD02	Motor	0.00162457	0	1
122	DD01	Motor	VD02	Motor	0.00303392	0	0	122	AVAR	Inter	PVCL	Inter	0.00147988	0	1	122	URYDR	Sensory	AVAR	Inter	0.0015924	0	1
123	VD02	Motor	DD01	Motor	0.00303392	0	0	123	AVFR	Inter	AVBR	Inter	0.00147579	0	1	123	AVAR	Inter	URYDR	Sensory	0.0015924	0	1
124	AVAR	Inter	DA04	Motor	0.00302721	0	0	124	PVCL	Inter	AVAL	Inter	0.00147399	0	1	124	RIML	Motor	AIYL	Inter	0.0015857	0	1
125	AS07	Motor	AVAR	Inter	0.00301826	0	0	125	PHCL	Sensory	DVA	Inter	0.0014651	0	1	125	AIYL	Inter	RIML	Motor	0.0015857	0	1
126	AVAR	Inter	VA08	Motor	0.00301607	0	0	126	DVC	Inter	AIBR	Inter	0.00146081	0	1	126	AVAR	Inter	VA11	Motor	0.00158536	0	1
127	AVBL	Inter	VB02	Motor	0.00300132	0	0	127	AVBL	Inter	VB08	Motor	0.00143905	0	1	127	AVAR	Inter	DA08	Motor	0.00157431	0	1
128	ASGL	Sensory	AIAL	Inter	0.00297954	0	0	128	VB08	Motor	AVBL	Inter	0.00143905	0	1	128	SIBDR	Inter	RIBR	Inter	0.00155353	0	1
129	PDEL	Sensory	DVA	Inter	0.00297288	0	0	129	RIR	Inter	URXL	Sensory	0.0014315	0	1	129	RIBR	Inter	SIBDR	Inter	0.00155353	0	1
130	DA05	Motor	AVAR	Inter	0.00297223	0	0	130	AS02	Motor	VD02	Motor	0.00142356	0	1	130	DVA	Inter	RIAR	Inter	0.00154616	0	1
131	PLNL	Sensory	SMBVL	Motor	0.00296758	0	0	131	RIFR	Inter	AVBR	Inter	0.00141086	0	1	131	AS06	Motor	DA05	Motor	0.00154348	0	1
132	VB03	Motor	VA07	Motor	0.00295924	0	0	132	OLQVL	Sensory	IL2VL	Sensory	0.00138613	0	1	132	DA05	Motor	AS06	Motor	0.00154348	0	1
133	VA07	Motor	VB03	Motor	0.00295924	0	0	133	AVAL	Inter	AS05	Motor	0.0013834	0	1	133	VA11	Motor	VD12	Motor	0.00153811	0	1
134	AVAR	Inter	VA12	Motor	0.00294061	0	0	134	RMHL	Motor	RMGL	Motor	0.00138055	0	1	134	PHAR	Sensory	PHBR	Sensory	0.00152002	0	1
135	VA12	Motor	AVAR	Inter	0.00294061	0	0	135	RMGL	Motor	RMHL	Motor	0.00138055	0	1	135	IL1DL	Sensory	PVR	Sensory	0.00150796	0	1
136	PVM	Sensory	PDEL	Sensory	0.00293558	0	0	136	RIFL	Inter	AVBL	Inter	0.00137403	0	1	136	RIAR	Inter	IL1R	Sensory	0.00150594	0	1
137	ASEL	Sensory	AIYL	Inter	0.00292775	0	0	137	AVAL	Inter	VA01	Motor	0.00136254	0	1	137	AVAL	Inter	SABD	Inter	0.00150393	0	1
138	VD09	Motor	VD10	Motor	0.00286285	0	0	138	VA01	Motor	AVAL	Inter	0.00136254	0	1	138	SABD	Inter	AVAL	Inter	0.00150393	0	1
139	VD10	Motor	VD09	Motor	0.00286285	0	0	139	URYVL	Sensory	AVER	Inter	0.00135736	0	1	139	AIBL	Inter	AVBL	Inter	0.00150393	0	1
140	AVKR	Inter	AVKL	Inter	0.00286111	0	0	140	SABVR	Inter	DA01	Motor	0.0013474	0	1	140	PVNR	Inter	BDUR	Inter	0.00146506	0	1
141	AVKL	Inter	AVKR	Inter	0.00286111	0	0	141	DA01	Motor	SABVR	Inter	0.0013474	0	1	141	AS09	Motor	DVB	Motor	0.00146104	0	1
142	PVDL	Inter	PVCR	Inter	0.00285671	0	0	142	URBL	Sensory	URXL	Sensory	0.00132759	0	1	142	DVB	Motor	AS09	Motor	0.00146104	0	1
143	PHBL	Sensory	AVAL	Inter	0.002856	0	0	143	PHCR	Sensory	PVCR	Inter	0.00132428	0	1	143	AVKL	Inter	VB01	Motor	0.00145903	0	1
144	AVER	Inter	AVAL	Inter	0.00284528	0	0	144	LUAL	Inter	AVAL	Inter	0.00132143	0	1	144	VB01	Motor	AVKL	Inter	0.00145903	0	1
145	ASKL	Sensory	AIAL	Inter	0.00282085	0	0	145	PVCR	Inter	SIBVR	Inter	0.00127871	0	1	145	DVC	Inter	RIGR	Inter	0.00145836	0	1
146	IL2VR	Sensory	RIPR	Inter	0.00282046	0	0	146	RIS	Inter	CEPVL	Sensory	0.00127641	0	1	146	AIAL	Inter	ASKL	Sensory	0.00145702	0	1
147	SMBVL	Motor	PLNL	Sensory	0.00280553	0	0	147	VD09	Motor	VD10	Motor	0.00127287	0	1	147	RIH	Inter	AIZL	Inter	0.00145266	0	1
148	VA09	Motor	VD09	Motor	0.00278898	0	0	148	VD10	Motor	VD09	Motor	0.00127287	0	1	148	PVQR	Inter	ASKR	Sensory	0.00144965	0	1
149	PQR	Sensory	AVAR	Inter	0.00275562	0	0	149	RIMR	Motor	AIBL	Inter	0.00126924	0	1	149	AVAR	Inter	AVDR	Inter	0.00144965	0	1
150	RIAR	Inter	RIAL	Inter	0.00274768	0	0	150	AVBL	Inter	VB02	Motor	0.00126556	0	1	150	DVA	Inter	AVEL	Inter	0.00144764	0	1
151	VC03	Motor	VC01	Motor	0.00274194	0	0	151	VB02	Motor	AVBL	Inter	0.00126556	0	1	151	RIAL	Inter	RIVR	Motor	0.00144161	0	1
152	PVM	Sensory	AVKL	Inter	0.00271633	0	0	152	AS07	Motor	AVAL	Inter	0.00125137	0	1	152	RIH	Inter	AIZR	Inter	0.00143959	0	1
153	AVBL	Inter	VB07	Motor	0.00271591	0	0	153	DVC	Inter	AVAR	Inter	0.00124678	0	1	153	AWAR	Sensory	AIZR	Inter	0.00142351	0	1
154	VB07	Motor	AVBL	Inter	0.00271591	0	0	154	RMER	Motor	RMEV	Motor	0.00124322	0	1	154	RIS	Inter	AVKR	Inter	0.00142351	0	1
155	AVAR	Inter	DA08	Motor	0.00270084	0	0	155	RMEV	Motor	RMER	Motor	0.00124322	0	1	155	AVBL	Inter	VB02	Motor	0.00141681	0	1
156	VB08	Motor	VD10	Motor	0.00264791	0	0	156	VD01	Motor	VD02	Motor	0.00123509	0	1	156	VB02	Motor	AVBL	Inter	0.00141681	0	1
157	VA05	Motor	AVAR	Inter	0.00261493	0	0	157	VD02	Motor	VD01	Motor	0.00123509	0	1	157	DVA	Inter	SMBVL	Motor	0.00140944	0	1
158	DVA	Inter	AVBL	Inter	0.00259325	0	0	158	AIAL	Inter	ASER	Sensory	0.00121464	0	1	158	RMGR	Motor	AIMR	Inter	0.00139938	0	1
159	PVQR	Inter	ASKR	Sensory	0.00259105	0	0	159	DVA	Inter	AQR	Sensory	0.00121332	0	1	159	URYDL	Sensory	AVER	Inter	0.00139938	0	1
160	ASKL	Sensory	PVQL	Inter	0.00258369	0	0	160	AVAR	Inter	AS11	Motor	0.00120918	0	1	160	DA08	Motor	AVAR	Inter	0.00139737	0	1
161	VB06	Motor	DA04	Motor	0.00257587	0	0	161	DVC	Inter	RIGR	Inter	0.00120083	0	1	161	AS04	Motor	DA03	Motor	0.00139335	0	1
162	DA04	Motor	VB06	Motor	0.00257587	0	0	162	AVDL	Inter	AVM	Sensory	0.00119378	0	1	162	RIBL	Inter	RIBR	Inter	0.00139067	0	1
163	AVAR	Inter	AVDL	Inter	0.00257035	0	0	163	AVM	Sensory	AVDL	Inter	0.00119378	0	1	163	RIBR	Inter	RIBL	Inter	0.00139067	0	1
164	VC02	Motor	VC03	Motor	0.00256269	0	0	164	VA11	Motor	PVNR	Inter	0.00119256	0	1	164	AVBR	Inter	HSNR	Motor	0.00138866	0	1
165	VA08	Motor	PDER	Sensory	0.00254803	0	0	165	AVBR	Inter	AVAR	Inter	0.00119153	0	1	165	AVBL	Inter	VB11	Motor	0.00138598	0	1
166	PDER	Sensory	VA08	Motor	0.00254803	0	0	166	AVAL	Inter	DA03	Motor	0.00118882	0	1	166	VB11	Motor	AVBL	Inter	0.00138598	0	1
167	PDER	Sensory	AVKL	Inter	0.00252425	0	0	167	OLLR	Sensory	CEPVR	Sensory	0.00118478	0	1	167	DA03	Motor	AS04	Motor	0.00138129	0	1
168	FLPL	Sensory	AVAL	Inter	0.00252188	0	0	168	ASIR	Sensory	AIAR	Inter	0.00116972	0	1	168	AIZL	Inter	ASEL	Sensory	0.00137794	0	0
169	AVAR	Inter	VA04	Motor	0.00251465	0	0	169	VA11	Motor	VD12	Motor	0.00116838	0	1	169	AIBL	Inter	RIGR	Inter	0.00136051	0	0
170	AVEL	Inter	AVAR	Inter	0.00249506	0	0	170	VA03	Motor	AVAR	Inter	0.00116386	0	1	170	RIGR	Inter	AIBL	Inter	0.00136051	0	0
171	PVCL	Inter	DVA	Inter	0.00248919	0	0	171	AVAL	Inter	LUAL	Inter	0.00116024	0	1	171	AIZL	Inter	RIAL	Inter	0.00135917	0	0
172	AVAL	Inter	DA02	Motor	0.00248816	0	0	172	VA02	Motor	VD02	Motor	0.00115981	0	1	172	VC03	Motor	VC05	Motor	0.0013585	0	0
173	AIAR	Inter	AIBR	Inter	0.00247706	0	0	173	PHAR	Sensory	PHAL	Sensory	0.00115404	0	1	173	VC05	Motor	VC03	Motor	0.0013585	0	0
174	VC04	Motor	VC03	Motor	0.00246247	0	0	174	ASGR	Sensory	AIAR	Inter	0.00115094	0	1	174	VC01	Motor	VD01	Motor	0.00135113	0	0
175	DA07	Motor	AVAL	Inter	0.00243563	0	0	175	URYVR	Sensory	AVEL	Inter	0.00115017	0	1	175	CEPVL	Sensory	URAVL	Sensory	0.00133705	0	0
176	AVAL	Inter	AVDL	Inter	0.00242854	0	0	176	AWAL	Sensory	AIZL	Inter	0.0011497	0	1	176	AQR	Sensory	RIAL	Inter	0.00132834	0	0
177	AVBR	Inter	DB01	Motor	0.00242711	0	0	177	AVAL	Inter	AS03	Motor	0.00114711	0	1	177	AVAR	Inter	SABVL	Inter	0.001327	0	0
178	DB01	Motor	AVBR	Inter	0.00242711	0	0	178	AS03	Motor	AVAL	Inter	0.00114711	0	1	178	AS05	Motor	VD05	Motor	0.00132499	0	0
179	PHAR	Sensory	PHAL	Sensory	0.00239882	0	0	179	RIAL	Inter	RMDL	Motor	0.00113622	0	1	179	PVCL	Inter	PVCR	Inter	0.00132063	0	0
180	ASJL	Sensory	ASKL	Sensory	0.00238648	0	0	180	DA04	Motor	VD04	Motor	0.00112555	0	1	180	PVCR	Inter	PVCL	Inter	0.00132063	0	0
181	AVAL	Inter	VA06	Motor	0.00237004	0	0	181	AIZL	Inter	RIAL	Inter	0.00112543	0	1	181	AVAR	Inter	PVCR	Inter	0.00131728	0	0
182	PHBR	Sensory	AVAR	Inter	0.00236867	0	0	182	AVBL	Inter	AVAL	Inter	0.00112528	0	1	182	AIBR	Inter	RIGL	Inter	0.00130891	0	0
183	AVAL	Inter	DA01	Motor	0.00236546	0	0	183	PVCL	Inter	RIS	Inter	0.00111956	0	1	183	RIGL	Inter	AIBR	Inter	0.00130891	0	0
184	PHBR	Sensory	AVAL	Inter	0.00236015	0	0	184	ADER	Sensory	AVAL	Inter	0.00110707	0	1	184	PVCR	Inter	AVAL	Inter	0.00130756	0	0
185	AIAL	Inter	AIBL	Inter	0.00235697	0	0	185	AIBR	Inter	DVC	Inter	0.00110113	0	1	185	URYDL	Sensory	AVAL	Inter	0.00130287	0	0
186	PHBL	Sensory	PVCL	Inter	0.0023498	0	0	186	AIZR	Inter	AVEL	Inter	0.00109475	0	1	186	AVAL	Inter	URYDL	Sensory	0.00130287	0	0
187	VA12	Motor	PVCR	Inter	0.00234692	0	0	187	RIGL	Inter	RMHR	Motor	0.00109254	0	1	187	RIMR	Motor	AIYR	Inter	0.00129885	0	0
188	AVAR	Inter	DA03	Motor	0.00233957	0	0	188	IL2L	Sensory	RIH	Inter	0.0010904	0	1	188	AIYR	Inter	RIMR	Motor	0.00129885	0	0
189	AVBR	Inter	VB08	Motor	0.00231254	0	0	189	AVAL	Inter	AS08	Motor	0.00107378	0	1	189	VC04	Motor	VC03	Motor	0.0012707	0	0
190	VB08	Motor	AVBR	Inter	0.00231254	0	0	190	VC03	Motor	PVQR	Inter	0.00107256	0	1	190	SMBDL	Motor	SAAVR	Inter	0.00126166	0	0
191	PHBL	Sensory	AVAR	Inter	0.00229668	0	0	191	AVAL	Inter	DA05	Motor	0.00106594	0	1	191	RIML	Motor	SAAVL	Inter	0.00125763	0	0
192	VA05	Motor	AVAL	Inter	0.00229621	0	0	192	PVCL	Inter	AVBR	Inter	0.00105401	0	1	192	VD07	Motor	VA09	Motor	0.00125261	0	0
193	ADFL	Sensory	AIZL	Inter	0.00228939	0	0	193	ADFL	Sensory	AIZL	Inter	0.00105367	0	1	193	VA09	Motor	VD07	Motor	0.00125261	0	0
194	VB07	Motor	DD04	Motor	0.00228441	0	0	194	SMBDR	Motor	SAAVL	Inter	0.00104818	0	1	194	OLQDL	Sensory	RIBL	Inter	0.00124591	0	0
195	DVA	Inter	PVCL	Inter	0.00228298	0	0	195	AVFL	Inter	AVHR	Inter	0.00103684	0	1	195	RIBL	Inter	OLQDL	Sensory	0.00124591	0	0
196	VC01	Motor	VC03	Motor	0.00228058	0	0	196	DVC	Inter	RMFR	Motor	0.00101655	0	1	196	AVM	Sensory	BDUL	Inter	0.00123337	0	0
197	AVAL	Inter	AS03	Motor	0.00227654	0	0	197	AIBL	Inter	RIGR	Inter	0.0010159	0	1	197	RIVR	Motor	SIAVL	Inter	0.0012325	0	0
198	SABVL	Inter	AVAR	Inter	0.00225953	0	0	198	RIGR	Inter	AIBL	Inter	0.0010159	0	1	198	VC01	Motor	VC03	Motor	0.00123049	0	0
199	AS08	Motor	AVAL	Inter	0.00225733	0	0	199	VD11	Motor	AVAR	Inter	0.00101154	0	1	199	VC03	Motor	VC01	Motor	0.00123049	0	0
200	ASIL	Sensory	ASIR	Sensory	0.0022467	0	0	200	LUAR	Inter	AVAR	Inter	0.00098957	0	1	200	URADL	Sensory	IL1DL	Sensory	0.00120435	0	0
201	ASIR	Sensory	ASIL	Sensory	0.0022467	0	0	201	RIMR	Motor	RMDL	Motor	0.000985389	0	1	201	AIZR	Inter	DVA	Inter	0.00120435	0	0
202	AVAL	Inter	VB09	Motor	0.00223657	0	0	202	AVBR	Inter	PVNL	Inter	0.000982458	0	1	202	VC05	Motor	URBL	Sensory	0.00118626	0	0
203	VB09	Motor	AVAL	Inter	0.00223657	0	0	203	PVNL	Inter	AVBR	Inter	0.000982458	0	1	203	AVDL	Inter	AVM	Sensory	0.00118043	0	0
204	AVAR	Inter	AS05	Motor	0.00222703	0	0	204	PVQR	Inter	ASKR	Sensory	0.000981489	0	1	204	AVM	Sensory	AVDL	Inter	0.00118043	0	0
205	AVAR	Inter	DA02	Motor	0.00222637	0	0	205	AS08	Motor	AVAL	Inter	0.000973655	0	1	205	PVNL	Inter	BDUL	Inter	0.00117889	0	0
206	DA06	Motor	AVAL	Inter	0.00222283	0	0	206	PVPL	Inter	PQR	Sensory	0.000970415	0	1	206	BDUL	Inter	ADEL	Sensory	0.00117285	0	0
207	AVAR	Inter	VA07	Motor	0.00221024	0	0	207	PQR	Sensory	PVPL	Inter	0.000970415	0	1	207	SIBDR	Inter	AIML	Inter	0.00117218	0	0
208	VA07	Motor	AVAR	Inter	0.00221024	0	0	208	AVBL	Inter	AVAR	Inter	0.000969138	0	1	208	AIML	Inter	SIBDR	Inter	0.00117218	0	0
209	PHAL	Sensory	PHAR	Sensory	0.00220918	0	0	209	VA08	Motor	VD07	Motor	0.00096706	0	1	209	IL1R	Sensory	RMDL	Motor	0.00116314	0	0
210	PQR	Sensory	AVAL	Inter	0.00218209	0	0	210	ASIL	Sensory	AIAL	Inter	0.000966235	0	1	210	URYVR	Sensory	AVAL	Inter	0.00115409	0	0
211	VA12	Motor	DA09	Motor	0.00217339	0	0	211	AIAL	Inter	ASIL	Sensory	0.000966235	0	1	211	AVAL	Inter	URYVR	Sensory	0.00115409	0	0
212	AVEL	Inter	AVER	Inter	0.00216538	0	0	212	ASKL	Sensory	AIAL	Inter	0.000966166	0	1	212	AVAR	Inter	AS11	Motor	0.00114068	0	0
213	AVER	Inter	AVEL	Inter	0.00216538	0	0	213	AVAL	Inter	DB06	Motor	0.000957603	0	1	213	RIBR	Inter	BAGL	Sensory	0.00113063	0	0
214	FLPL	Sensory	AVAR	Inter	0.00215204	0	0	214	DB06	Motor	AVAL	Inter	0.000957603	0	1	214	ASHR	Sensory	AIAR	Inter	0.00112762	0	0
215	DB03	Motor	VD05	Motor	0.00214834	0	0	215	ASER	Sensory	AIYR	Inter	0.000953067	0	1	215	RIGL	Inter	RIR	Inter	0.00112661	0	0
216	AS07	Motor	AVAL	Inter	0.00214586	0	0	216	VA09	Motor	VD09	Motor	0.000952237	0	1	216	VA11	Motor	PVNR	Inter	0.00112493	0	0
217	AVAR	Inter	AS01	Motor	0.00212564	0	0	217	AWCL	Sensory	AIYL	Inter	0.000942375	0	1	217	AIZL	Inter	AIBR	Inter	0.00112393	0	0
218	DB03	Motor	VD04	Motor	0.00211001	0	0	218	VA06	Motor	DD03	Motor	0.000940629	0	1	218	ASGL	Sensory	AIZL	Inter	0.0011179	0	0
219	AVAL	Inter	VA09	Motor	0.0021075	0	0	219	OLQDL	Sensory	RIBL	Inter	0.000940079	0	1	219	AIZL	Inter	ASGL	Sensory	0.0011179	0	0
220	AVAR	Inter	AS10	Motor	0.00208976	0	0	220	RIBL	Inter	OLQDL	Sensory	0.000940079	0	1	220	AIAL	Inter	AIML	Inter	0.00110449	0	0
221	VB02	Motor	AVBL	Inter	0.00206244	0	0	221	PVCR	Inter	VB04	Motor	0.000936478	0	1	221	AVKR	Inter	RIGR	Inter	0.00109779	0	0
222	ASKL	Sensory	ASKR	Sensory	0.00206243	0	0	222	AVDR	Inter	AVAL	Inter	0.000936391	0	1	222	RIGR	Inter	AVKR	Inter	0.00109779	0	0
223	ASKR	Sensory	ASKL	Sensory	0.00206243	0	0	223	ASKR	Sensory	AIAR	Inter	0.000935082	0	1	223	VA09	Motor	VB08	Motor	0.00109578	0	0
224	ASJR	Sensory	ASKR	Sensory	0.00206006	0	0	224	AIAR	Inter	ASIR	Sensory	0.000933975	0	1	224	RIBR	Inter	RIH	Inter	0.00109243	0	0
225	AVAR	Inter	SABVR	Inter	0.0020594	0	0	225	URXL	Sensory	AVEL	Inter	0.00093297	0	1	225	AUAL	Sensory	AVAL	Inter	0.00108774	0	0
226	SABVR	Inter	AVAR	Inter	0.0020594	0	0	226	DA08	Motor	AVAR	Inter	0.000927062	0	1	226	AVHR	Inter	ADLR	Sensory	0.00107769	0	0
227	ASJR	Sensory	PVQR	Inter	0.00205627	0	0	227	AIZL	Inter	SMBVL	Motor	0.000921688	0	1	227	PVCR	Inter	VB04	Motor	0.00107567	0	0
228	AVAR	Inter	AS11	Motor	0.00205445	0	0	228	AVAR	Inter	DA03	Motor	0.000920392	0	1	228	AS11	Motor	VD13	Motor	0.00105758	0	0
229	VD10	Motor	DVC	Inter	0.0020339	0	0	229	DA03	Motor	AVAR	Inter	0.000920392	0	1	229	VB02	Motor	VB01	Motor	0.0010549	0	0
230	DVC	Inter	VD10	Motor	0.0020339	0	0	230	PVCL	Inter	VB10	Motor	0.000919557	0	1	230	VB01	Motor	VB02	Motor	0.0010549	0	0
231	AWAL	Sensory	AIZL	Inter	0.00203013	0	0	231	VD04	Motor	PVPR	Inter	0.000912257	0	1	231	IL2VR	Sensory	URAVR	Sensory	0.00105356	0	0
232	HSNR	Motor	DA06	Motor	0.00202758	0	0	232	PVPR	Inter	VD04	Motor	0.000912257	0	1	232	AVER	Inter	RIML	Motor	0.00104753	0	0
233	OLQVL	Sensory	RIBL	Inter	0.0020134	0	0	233	AIAR	Inter	AWCR	Sensory	0.000910882	0	1	233	RIML	Motor	AVER	Inter	0.00104753	0	0
234	RIBL	Inter	OLQVL	Sensory	0.0020134	0	0	234	AVAR	Inter	AS06	Motor	0.000905583	0	1	234	PDB	Motor	VD13	Motor	0.00104552	0	0
235	AVAR	Inter	AS06	Motor	0.00201093	0	0	235	AVDL	Inter	AVAR	Inter	0.000903469	0	1	235	URBR	Sensory	URXR	Sensory	0.00104552	0	0
236	AWCR	Sensory	AWCL	Sensory	0.00200768	0	0	236	PLNL	Sensory	SAADL	Inter	0.000896088	0	1	236	DVC	Inter	AVAR	Inter	0.00103747	0	0
237	RMDDR	Motor	RMDVL	Motor	0.00200523	0	0	237	ALNL	Sensory	SAAVL	Inter	0.000878296	0	0	237	PVCL	Inter	AVAL	Inter	0.00103747	0	0
238	AVBR	Inter	VB02	Motor	0.00199715	0	0	238	ASHR	Sensory	AIAR	Inter	0.000868909	0	0	238	AVBR	Inter	AVAR	Inter	0.0010368	0	0
239	VB02	Motor	AVBR	Inter	0.00199715	0	0	239	PVCR	Inter	AVBL	Inter	0.000867673	0	0	239	RIAL	Inter	CEPVL	Sensory	0.00102038	0	0
240	DA03	Motor	VD04	Motor	0.00199548	0	0	240	IL2VR	Sensory	RIH	Inter	0.000863204	0	0	240	VA02	Motor	VB01	Motor	0.00101938	0	0
